# Supplementary material for: High likelihood of actionable pathogenic variant detection in breast cancer genes in women with very early onset breast cancer
Source: PubMed Central journal article supplement (PMC8788257; doi:10.1136/jmedgenet-2020-107347), 2021-03-23
Supplement: jmedgenet-2020-107347supp001.pdf [file jmedgenet-2020-107347supp001.pdf]

**Supplementary Table 1: Pathogenic variants identified in women diagnosed with breast cancer at the age of thirty or younger.**

| Nr | MS | Gene  | Variant                                 | Type variant | ACMG | Age group | DCIS/<br>Lobular/<br>Invasive | Grade | Receptor Status | Sporadic breast cancer | Bilateral breast cancer |
|----|----|-------|-----------------------------------------|--------------|------|-----------|-------------------------------|-------|-----------------|------------------------|-------------------------|
| 1  | 36 | ATM   | c.2165dupT; p.(Leu722Phefs*16)          | Truncating   | 5    | <26       | Invasive                      | 2     | ER+             | No                     |                         |
| 2  | 24 | BRCA1 | c.34C>T; p.(Gln12*)                     | Truncating   | 5    | <26       | Invasive                      | 3     | ER-/HER2-       | No                     |                         |
| 3  | 24 | BRCA1 | c.4065_4068delTCAA; p.(Asn1355Lysfs*10) | Truncating   | 5    | <26       | Invasive                      | 3     | ER+/HER2-       | No                     | Yes                     |
| 4  | 25 | BRCA1 | c.4065_4068delTCAA; p.(Asn1355Lysfs*10) | Truncating   | 5    | <26       | Invasive                      | 3     | ER-/HER2-       | No                     |                         |
| 5  | 43 | BRCA1 | c.547+1G>T; p.?                         | Truncating   | 5    | <26       | Invasive                      | 3     | ER-/HER2-       | No                     |                         |
| 6  | 27 | BRCA1 | c.3779delT; p.(Leu1260Tyrfs*4)          | Truncating   | 5    | <26       | Invasive                      | 3     | ER-/HER2-       | No                     |                         |
| 7  | 39 | BRCA1 | c.3668_3671dup; p.(Cys1225Serfs*10)     | Truncating   | 5    | <26       | Invasive                      | 3     | ER-/HER2-       | No                     |                         |
| 8  | 20 | BRCA2 | c.3599_3600delGT; p.(Cys1200*)          | Truncating   | 5    | <26       | Invasive                      | 3     | ER-/HER2-       | Yes                    |                         |
| 9  | 23 | BRCA2 | c.7757G>A; p.(Trp2586*)                 | Truncating   | 5    | <26       | Invasive                      | 3     | ER+             | No                     |                         |
| 10 | 34 | BRCA2 | c.5946delT; p.(Ser1982Argfs*22)         | Truncating   | 5    | <26       | DCIS                          |       |                 | No                     | Yes                     |
| 11 | 25 | TP53  | c.571_572delCC; p.(Pro191Serfs*17)      | Truncating   | 5    | <26       | DCIS                          |       |                 | No                     |                         |
| 12 | 55 | TP53  | c.993+1G>A; p.?                         | Splice site  | 5    | <26       | DCIS                          |       |                 | No                     | Yes                     |
| 13 | 6  | TP53  | c.524G>A; p.(Arg175His)                 | Missense     | 5    | <26       | Invasive                      | 3     | ER+/HER2+       | Yes                    |                         |
| 14 | 17 | TP53  | c.949C>T; p.(Gln317*)                   | Truncating   | 5    | <26       | Lobular                       |       | ER+/HER2+       | Yes                    | Yes                     |
| 15 | 24 | TP53  | c.742C>T; p.(Arg248Trp)                 | Missense     | 5    | <26       | Invasive                      | 3     | ER+/HER2-       | No                     |                         |
| 16 | 18 | TP53  | c.730G>A; p.(Gly244Ser)                 | Missense     | 5    | <26       | Invasive                      | 3     |                 | Yes                    | Yes                     |
| 17 | 6  | TP53  | c.638G>A; p.(Arg213Gln)                 | Missense     | 5    | <26       | Invasive                      | 3     | ER+/HER2+       | Yes                    |                         |
| 18 | 20 | ATM   | c.3802delG; p.(Val1268*)                | Truncating   | 5    | 26-30     | Invasive                      | 3     | ER+/HER2-       | No                     |                         |
| 19 | 24 | BRCA1 | c.1953dupG; p.(Lys652Glu fs*21)         | Truncating   | 5    | 26-30     | DCIS                          |       |                 | No                     |                         |
| 20 | 47 | BRCA1 | c.5362G>A; p.(Gly1749Asp)               | Missense     | 4    | 26-30     | Invasive                      | 3     | ER-/HER2-       | No                     |                         |
| 21 | 32 | BRCA1 | c.5194-12G>A; p.?                       | Splice site  | 4    | 26-30     | Invasive                      | 3     | ER-/HER2-       | No                     |                         |
| 22 | 32 | BRCA1 | c.68_69delAG; p.(Glu23Valfs*17)         | Truncating   | 5    | 26-30     | Invasive                      | 3     | ER-/HER2-       | No                     |                         |
| 23 | 34 | BRCA1 | c.5503C>T; p.(Arg1835*)                 | Truncating   | 5    | 26-30     | Invasive                      | 3     | ER-/HER2-       | No                     |                         |
| 24 | 41 | BRCA1 | c.3358_3359delGT; p.Val1120*            | Truncating   | 5    | 26-30     | Invasive                      | 3     | ER-/HER2-       | No                     |                         |

|    |    |       |                                         |             |   |       |          |   |            |     |     |
|----|----|-------|-----------------------------------------|-------------|---|-------|----------|---|------------|-----|-----|
| 25 | 40 | BRCA1 | c.4438dupT; p.(Ser1480Phefs*4)          | Truncating  | 5 | 26-30 | Invasive | 3 | ER-/HER2-  | No  | Yes |
| 26 | 39 | BRCA1 | c.1961dupA; p.(Tyr655Valfs*18)          | Truncating  | 5 | 26-30 | Invasive | 3 | ER+        | No  |     |
| 27 | 55 | BRCA1 | c.4065_4068delTCAA; p.(Asn1355Lysfs*10) | Truncating  | 5 | 26-30 | Invasive | 3 | ER-/HER2-  | No  | Yes |
| 28 | 35 | BRCA1 | c.2563C>T; p.Gln855*                    | Truncating  | 5 | 26-30 | Invasive | 3 | ER-/HER2-  | No  |     |
| 29 | 43 | BRCA1 | c.68_69delAG; p.(Glu23Valfs*17)         | Truncating  | 5 | 26-30 | Lobular  |   | ER+        | No  | Yes |
| 30 | 25 | BRCA1 | c.68_69delAG; p.(Glu23Valfs*17)         | Truncating  | 5 | 26-30 | Invasive | 3 | ER-/HER2-  | Yes | Yes |
| 31 | 23 | BRCA1 | c.427G>T; p.(Glu143*)                   | Truncating  | 5 | 26-30 | Invasive | 3 | ER-/HER2-  | No  |     |
| 32 | 23 | BRCA1 | Deletion exons 1-17                     | CNV         | 5 | 26-30 | Invasive | 3 | ER-/HER2-  | No  |     |
| 33 | 19 | BRCA1 | Deletion exons 1-2                      | CNV         | 5 | 26-30 | NOS      |   |            | No  |     |
| 34 | 54 | BRCA1 | c.302-2delA; p.?                        | Splice site | 5 | 26-30 | DCIS     |   |            | No  |     |
| 35 | 37 | BRCA1 | Deletion exons 15-16                    | CNV         | 5 | 26-30 | Invasive | 3 | ER-/HER2-  | No  | Yes |
| 36 | 35 | BRCA1 | c.-107A>T; p.?                          | Promotor    | 5 | 26-30 | Invasive | 3 | ER-/HER2-  | No  | Yes |
| 37 | 59 | BRCA1 | c.1757delC; p.(Pro586Leufs*2)           | Truncating  | 5 | 26-30 | Invasive | 3 | ER-/HER2-  | No  |     |
| 38 | 25 | BRCA1 | Duplication exons 18-19                 | CNV         | 5 | 26-30 | Invasive | 3 | ER-/HER2-  | No  | Yes |
| 39 | 24 | BRCA1 | c.3396delC; p.(Leu1133*)                | Truncating  | 5 | 26-30 | Invasive | 2 | ER+/HER2-  | No  |     |
| 40 | 30 | BRCA1 | c.5117G>A; p.(Gly1706Glu)               | Missense    | 5 | 26-30 | Invasive | 3 | ER-/HER2-  | No  | Yes |
| 41 | 38 | BRCA1 | Deletion exons 1-2                      | CNV         | 5 | 26-30 | Invasive | 3 | ER-/HER2-  | No  |     |
| 42 | 14 | BRCA1 | Duplication exon 13                     | CNV         | 5 | 26-30 | Invasive | 3 | ER-/HER2-  | Yes |     |
| 43 | 45 | BRCA1 | c.3607C>T; p.(Arg1203*)                 | Truncating  | 5 | 26-30 | Invasive | 3 | ER-/HER2-  | No  |     |
| 44 | 17 | BRCA1 | Duplication exon 13                     | CNV         | 5 | 26-30 | Invasive | 3 | ER-/HER2-  | Yes |     |
| 45 | 71 | BRCA1 | Deletion exon 24                        | CNV         | 5 | 26-30 | Invasive | 3 | ER-/HER2-  | No  |     |
| 46 | 15 | BRCA1 | c.1961dupA; p.(Tyr655Valfs*18)          | Truncating  | 5 | 26-30 | Invasive | 3 | ER+/HER2-  | No  |     |
| 47 | 47 | BRCA1 | c.3598C>T; p.(Gln1200*)                 | Truncating  | 5 | 26-30 | Invasive | 3 | ER-/HER2-* | No  |     |
| 48 | 17 | BRCA1 | c.4065_4068delTCAA; p.(Asn1355Lysfs*10) | Truncating  | 5 | 26-30 | Invasive | 3 | ER-/HER2-  | Yes |     |
| 49 | 17 | BRCA1 | c.4625_4626delCT; p.(Ser1542Trpfs*31)   | Truncating  | 5 | 26-30 | Invasive | 3 | ER-/HER2-  | Yes |     |
| 50 | 28 | BRCA1 | c.3400G>T; p.(Glu1134*)                 | Truncating  | 5 | 26-30 | Invasive | 3 |            | No  |     |

|    |    |       |                                         |             |   |       |          |   |           |     |     |
|----|----|-------|-----------------------------------------|-------------|---|-------|----------|---|-----------|-----|-----|
| 51 | 36 | BRCA1 | c.1175_1214del; p.(Leu392Glnfs*5)       | Truncating  | 5 | 26-30 | Invasive | 3 | ER-/HER2- | No  |     |
| 52 | 31 | BRCA1 | c.5108A>G; p.(Tyr1703Cys)               | Missense    | 4 | 26-30 | Invasive | 3 | ER-/HER2- | No  |     |
| 53 | 31 | BRCA1 | c.4065_4068delTCAA; p.(Asn1355Lysfs*10) | Truncating  | 5 | 26-30 | Invasive | 3 | ER+/HER2- | No  | Yes |
| 54 | 25 | BRCA1 | c.5179A>T; p.(Lys1727*)                 | Truncating  | 5 | 26-30 | Invasive | 3 | ER-/HER2- | No  |     |
| 55 | 18 | BRCA1 | c.4065_4068delTCAA; p.(Asn1355Lysfs*10) | Truncating  | 5 | 26-30 | Invasive | 3 | ER-/HER2- | No  |     |
| 56 | 22 | BRCA1 | c.3331_3334delCAAG; p.(Gln1111Asnfs*5)  | Truncating  | 5 | 26-30 | Invasive | 3 | ER+/HER2- | No  |     |
| 57 | 44 | BRCA1 | c.3869_3870del; p.(Lys1290Metfs*4)      | Truncating  | 5 | 26-30 | Invasive | 3 | ER-/HER2- | No  |     |
| 58 | 34 | BRCA1 | c.63_64delinsA; p.(Leu22*)              | Truncating  | 5 | 26-30 | Invasive | 3 |           | No  | Yes |
| 59 | 28 | BRCA1 | c.2475delC; p.(Asp825Glufs*21)          | Truncating  | 5 | 26-30 | Invasive | 3 | ER+/HER2- | No  | Yes |
| 60 | 18 | BRCA1 | c.5503C>T; p.(Arg1835*)                 | Truncating  | 5 | 26-30 | Invasive | 3 | ER+/HER2- | No  |     |
| 61 | 21 | BRCA1 | c.212+1G>T; p.?                         | Splice site | 5 | 26-30 | NOS      |   |           | No  |     |
| 62 | 29 | BRCA1 | c.4065_4068delTCAA; p.(Asn1355Lysfs*10) | Truncating  | 5 | 26-30 | Invasive | 3 | ER-/HER2- | No  |     |
| 63 | 15 | BRCA1 | c.3598C>T; p.(Gln1200*)                 | Truncating  | 5 | 26-30 | Invasive | 3 | ER+/HER2+ | No  |     |
| 64 | 31 | BRCA1 | c.213-11T>G; p.?                        | Splice site | 5 | 26-30 | Invasive | 3 | ER-/HER2- | No  | Yes |
| 65 | 31 | BRCA1 | Duplication exon 13                     | CNV         | 5 | 26-30 | Invasive | 3 | ER-/HER2- | No  |     |
| 66 | 17 | BRCA1 | c.38delA; p.(Asn13Metfs*10)             | Truncating  | 5 | 26-30 | Invasive | 3 | ER-/HER2- | Yes |     |
| 67 | 21 | BRCA1 | c.4123G>T; p.(Glu1375*)                 | Truncating  | 5 | 26-30 | Invasive | 3 | ER+/HER2- | No  | Yes |
| 68 | 21 | BRCA1 | Deletion exons 21-24                    | CNV         | 5 | 26-30 | Invasive | 3 | ER+/HER2- | No  |     |
| 69 | 31 | BRCA1 | Deletion exons 1-21                     | CNV         | 5 | 26-30 | NOS      |   |           | No  | Yes |
| 70 | 30 | BRCA1 | c.2681_2682delAA; p.(Lys894Thrfs*8)     | Truncating  | 5 | 26-30 | Invasive | 3 | ER-/HER2- | No  |     |
| 71 | 20 | BRCA1 | c.1423_1508del; p.(Ser475Alafs*2)       | Truncating  | 5 | 26-30 | Invasive | 3 | ER-/HER2- | No  |     |
| 72 | 50 | BRCA1 | c.5503C>T; p.(Arg1835*)                 | Truncating  | 5 | 26-30 | Invasive | 3 | ER-/HER2- | No  |     |
| 73 | 56 | BRCA1 | c.5152+4A>G; p.?                        | Splice site | 4 | 26-30 | Invasive | 3 | ER+/HER2- | No  |     |
| 74 | 45 | BRCA1 | c.427G>T; p.(Glu143*)                   | Truncating  | 5 | 26-30 | Invasive | 2 | ER+/HER2- | No  |     |
| 75 | 52 | BRCA1 | c.5387dupC; p.(Ser1797Ilefs*33)         | Truncating  | 5 | 26-30 | Invasive | 3 | ER-/HER2- | No  | Yes |
| 76 | 53 | BRCA1 | c.5362G>A; p.(Gly1749Asp)               | Missense    | 4 | 26-30 | Invasive | 3 | ER+/HER2- | No  |     |

|     |     |                 |                                                                          |             |        |       |          |   |           |     |     |
|-----|-----|-----------------|--------------------------------------------------------------------------|-------------|--------|-------|----------|---|-----------|-----|-----|
| 77  | 45  | BRCA1           | c.5406+1G>A; p.?                                                         | Splice site | 5      | 26-30 | Invasive | 3 | ER-/HER2- | No  |     |
| 78  | 48  | BRCA1           | c.3869_3870del; p.(Lys1290Metfs*4)                                       | Truncating  | 5      | 26-30 | Invasive | 3 | ER-/HER2- | No  |     |
| 79  | 42  | BRCA1           | Duplication exons 18-19                                                  | CNV         | 5      | 26-30 | Invasive | 3 | ER-/HER2- | No  |     |
| 80  | 50  | BRCA1           | c.4065_4068delTCAA; p.(Asn1355Lysfs*10)                                  | Truncating  | 5      | 26-30 | Invasive | 3 | ER-/HER2- | No  |     |
| 81  | 64  | BRCA1           | c.4327C>T; p.(Arg1443*)                                                  | Truncating  | 5      | 26-30 | Invasive | 2 | ER-/HER2- | No  |     |
| 82  | 48  | BRCA1           | c.1961delA; p.(Lys654Serfs*47)                                           | Truncating  | 5      | 26-30 | Invasive | 3 | ER+/HER2- | No  | Yes |
| 83  | 30  | BRCA1           | c.2071delA; p.(Arg691Aspfs*10)                                           | Truncating  | 5      | 26-30 | Invasive | 3 | ER+/HER2- | No  |     |
| 84  | 27  | BRCA1;<br>BRCA2 | c.4625_4626delCT; p.(Ser1542Trpfs*31);<br>c.5073dupA; p.(Trp1692Metfs*3) | Truncating  | 5<br>5 | 26-30 | Invasive | 3 | ER-/HER2- | Yes | Yes |
| 85  | 24  | BRCA2           | c.1929delG; p.(Arg645Glufs*15)                                           | Truncating  | 5      | 26-30 | NOS      |   |           | No  |     |
| 86  | 23  | BRCA2           | c.6275_6276del; p.(Leu2092Profs*7)                                       | Truncating  | 5      | 26-30 | Invasive | 3 | ER+       | No  |     |
| 87  | 34  | BRCA2           | Deletion exon 2                                                          | CNV         | 5      | 26-30 | Invasive | 2 | ER+       | No  | Yes |
| 88  | 18  | BRCA2           | c.6275_6276del; p.(Leu2092Profs*7)                                       | Truncating  | 5      | 26-30 | Invasive | 3 | ER+       | No  |     |
| 89  | 14  | BRCA2           | c.7480C>T; p.(Arg2494*)                                                  | Truncating  | 5      | 26-30 | Invasive | 3 |           | No  |     |
| 90  | 25  | BRCA2           | c.1058C>A; p.(Ser353*)                                                   | Truncating  | 5      | 26-30 | Invasive | 2 |           | No  |     |
| 91  | 16  | BRCA2           | c.8904delC; p.(Val2969Cysfs*7)                                           | Truncating  | 5      | 26-30 | Invasive | 3 | ER+       | No  |     |
| 92  | 22  | BRCA2           | c.574_575delAT; p.(Met192Valfs*13)                                       | Truncating  | 5      | 26-30 | Invasive | 3 | ER+       | No  |     |
| 93  | 102 | BRCA2           | c.6591_6592delTG; p.(Glu2198Asnfs*4)                                     | Truncating  | 5      | 26-30 | Invasive | 3 | ER+       | No  |     |
| 94  | 21  | BRCA2           | c.1929delG; p.(Arg645Glufs*15)                                           | Truncating  | 5      | 26-30 | Invasive | 2 | ER+       | No  |     |
| 95  | 18  | BRCA2           | c.7988A>T; p.(Glu2663Val)                                                | Missense    | 5      | 26-30 | Invasive | 3 | ER-/HER2+ | No  |     |
| 96  | 17  | BRCA2           | c.4478_4481delAAAG; p.(Glu1493Valfs*10)                                  | Truncating  | 5      | 26-30 | Invasive | 3 | ER+       | No  |     |
| 97  | 44  | BRCA2           | c.8912delA; p.(Lys2971Serfs*5)                                           | Truncating  | 5      | 26-30 | Invasive | 3 | ER+/HER2- | No  |     |
| 98  | 46  | BRCA2           | c.5682C>G; p.(Tyr1894*)                                                  | Truncating  | 5      | 26-30 | NOS      |   |           | No  | Yes |
| 99  | 11  | BRCA2           | c.5073dupA; p.(Trp1692Metfs*3)                                           | Truncating  | 5      | 26-30 | Invasive | 3 | ER+/HER2+ | Yes | Yes |
| 100 | 29  | BRCA2           | c.9294C>G; p.Tyr3098*                                                    | Truncating  | 5      | 26-30 | NOS      |   |           | No  | Yes |
| 101 | 43  | BRCA2           | c.26delC; p.(Pro9Glnfs*16)                                               | Truncating  | 5      | 26-30 | Invasive | 3 | ER-/HER2- | No  | Yes |

|     |     |              |                                          |             |   |       |          |   |           |     |     |
|-----|-----|--------------|------------------------------------------|-------------|---|-------|----------|---|-----------|-----|-----|
| 102 | 23  | <i>BRCA2</i> | c.7069_7070delCT; p.(Leu2357Valfs*2)     | Truncating  | 5 | 26-30 | Invasive | 3 | ER-/HER2- | No  |     |
| 103 | 42  | <i>BRCA2</i> | c.1929delG; p.(Arg645Glu fs*15)          | Truncating  | 5 | 26-30 | Invasive | 2 |           | No  |     |
| 104 | 16  | <i>BRCA2</i> | c.5303_5304delTT; p.(Leu1768Argfs*5)     | Truncating  | 5 | 26-30 | Lobular  |   | ER+/HER2- | No  |     |
| 105 | 18  | <i>BRCA2</i> | c.1813delA; p.(Ile605Tyrfs*9)            | Truncating  | 5 | 26-30 | Invasive | 3 | ER-/HER2- | Yes |     |
| 106 | 24  | <i>BRCA2</i> | c.2330dupA; p.(Asp777Glu fs*11)          | Truncating  | 5 | 26-30 | Invasive | 3 | ER+/HER2- | No  |     |
| 107 | 23  | <i>BRCA2</i> | c.1189_1190insTTAG; p.(Gln397Leufs*25)   | Truncating  | 5 | 26-30 | NOS      |   |           | No  |     |
| 108 | 16  | <i>BRCA2</i> | c.2899_2900delCT; p.(Leu967Argfs*14)     | Truncating  | 5 | 26-30 | Invasive | 2 | ER+       | No  |     |
| 109 | 27  | <i>BRCA2</i> | c.1964delC; p.(Pro655Glnfs*5)            | Truncating  | 5 | 26-30 | Invasive | 2 | ER+/HER2- | No  |     |
| 110 | 29  | <i>BRCA2</i> | c.7024C>T; p.(Gln2342*)                  | Truncating  | 5 | 26-30 | DCIS     |   |           | No  |     |
| 111 | 107 | <i>BRCA2</i> | c.6591_6592delTG; p.(Glu2198Asnfs*4)     | Truncating  | 5 | 26-30 | Invasive | 3 | ER-/HER2- | No  | Yes |
| 112 | 41  | <i>BRCA2</i> | Deletion exons 1-24                      | CNV         | 5 | 26-30 | Invasive | 2 | ER+/HER2- | No  |     |
| 113 | 25  | <i>BRCA2</i> | c.2808_2811delACAA p.(Ala938Profs*21)    | Truncating  | 5 | 26-30 | Invasive | 2 | ER+/HER2- | No  |     |
| 114 | 21  | <i>BRCA2</i> | c.5073dupA; p.(Trp1692Metfs*3)           | Truncating  | 5 | 26-30 | Invasive | 1 | ER+/HER2- | No  |     |
| 115 | 28  | <i>BRCA2</i> | c.4391_4392delCT; p.(Ser1464*)           | Truncating  | 5 | 26-30 | Invasive | 3 | ER+/HER2- | No  |     |
| 116 | 19  | <i>BRIP1</i> | c.2392C>T; p.(Arg798*)                   | Truncating  | 5 | 26-30 | Invasive | 2 | ER+       | No  | Yes |
| 117 | 11  | <i>CHEK2</i> | c.1100delC; p.(Thr367Metfs*15)           | Truncating  | 5 | 26-30 | NOS      |   |           | Yes |     |
| 118 | 13  | <i>CHEK2</i> | c.1100delC; p.(Thr367Metfs*15)           | Truncating  | 5 | 26-30 | Invasive | 3 |           | No  |     |
| 119 | 24  | <i>CHEK2</i> | c.283C>T; p.(Arg95*)                     | Truncating  | 5 | 26-30 | Invasive | 3 | ER+/HER2- | No  |     |
| 120 | 17  | <i>PALB2</i> | Translocation                            | CNV         | 5 | 26-30 | Invasive | 3 | ER-/HER2- | Yes |     |
| 121 | 12  | <i>PALB2</i> | c.3113G>A; p.(Trp1038*)                  | Truncating  | 5 | 26-30 | DCIS     |   |           | No  |     |
| 122 | 20  | <i>PALB2</i> | c.3113G>A; p.(Trp1038*)                  | Truncating  | 5 | 26-30 | Invasive | 3 | ER+/HER2- | No  |     |
| 123 | 14  | <i>PTEN</i>  | c.253+1G>A; p.?                          | Splice site | 5 | 26-30 | Invasive | 2 | ER+/HER2- | No  |     |
| 124 | 25  | <i>RAD50</i> | c.1300_1306del; p.(Asp434Lysfs*7)        | Truncating  | 5 | 26-30 | Invasive | 3 | ER+/HER2- | No  |     |
| 125 | 14  | <i>RECQL</i> | c.1667_1667+3delAGTA; p.(Glu557Lysfs*14) | Truncating  | 5 | 26-30 | Invasive | 3 | ER+/HER2+ | No  |     |
| 126 | 17  | <i>TP53</i>  | c.818G>A; p.(Arg273His)                  | Missense    | 5 | 26-30 | Invasive | 3 | ER-/HER2- | Yes |     |
| 127 | 28  | <i>TP53</i>  | c.659A>G; p.(Tyr220Cys)                  | Missense    | 5 | 26-30 | Invasive | 3 | ER-/HER2+ | Yes |     |

|     |    |       |                                               |             |   |       |          |   |           |     |     |
|-----|----|-------|-----------------------------------------------|-------------|---|-------|----------|---|-----------|-----|-----|
| 128 | 10 | TP53  | c.818G>A; p.(Arg273His)                       | Missense    | 5 | 26-30 | DCIS     |   |           | Yes | Yes |
| 129 | 8  | TP53  | c.574C>T; p.(Gln192*)                         | Truncating  | 5 | 26-30 | DCIS     |   |           | Yes |     |
| 130 | 28 | TP53  | c.659A>G; p.(Tyr220Cys)                       | Missense    | 5 | 26-30 | Invasive | 3 | ER+/HER2+ | Yes | Yes |
| 131 | 21 | TP53  | c.375G>T; p.(Thr125Thr)                       | Splice site | 5 | 26-30 | Invasive | 3 | ER+       | No  |     |
| 132 | 19 | TP53  | c.1009C>T; p.(Arg337Cys)                      | Missense    | 5 | 26-30 | Invasive | 3 | ER-/HER2+ | No  | Yes |
| 133 | 19 | TP53  | c.743G>A; p.(Arg248Gln)                       | Missense    | 5 | 26-30 | NOS      |   |           | Yes | Yes |
| 134 | 13 | TP53  | c.524G>A; p.(Arg175His) (22%)                 | Missense    | 5 | 26-30 | DCIS     |   |           | No  |     |
| 135 | 19 | TP53  | c.919+1G>A; p.?                               | Splice site | 5 | 26-30 | DCIS     |   |           | No  | Yes |
| 136 | 17 | TP53  | c.832C>T; p.(Pro278Ser)                       | Missense    | 4 | 26-30 | Invasive | 3 | ER-/HER2- | No  |     |
| 137 | 16 | TP53  | c.916C>T; p.(Arg306*)                         | Truncating  | 5 | 26-30 | Invasive | 3 | ER-/HER2+ | No  |     |
| 138 | 17 | TP53  | c.916C>T; p.(Arg306*)                         | Truncating  | 5 | 26-30 | Invasive | 3 | ER-/HER2- | Yes |     |
| 139 | 16 | TP53  | c.733G>A; p.(Gly245Ser)                       | Missense    | 5 | 26-30 | Invasive | 3 | ER+/HER2+ | Yes | Yes |
| 140 | 20 | TP53  | c.896_909delTGCCCCCAGGGAGC; p.(Leu299Hisfs*2) | Truncating  | 5 | 26-30 | Invasive | 3 | ER+/HER2- | No  | Yes |
| 141 | 12 | PALB2 | c.1467_1468delTC; p.(Pro490Argfs*5)           | Truncating  | 5 | <26   | Invasive | 3 | ER+/HER2- | No  |     |
| 142 | 23 | BRCA1 | c.191G>A; p.(Lys64Tyr)                        | Missense    | 4 | 26-30 | Invasive | 3 | ER-/HER2- | No  |     |
| 143 | 24 | BRCA1 | Deletion exon 13                              | CNV         | 5 | 26-30 | Invasive | 2 | ER-/HER2- | No  |     |
| 144 | 27 | BRCA1 | c.1033_1039dup; p.(Leu347Argfs*5)             | Truncating  | 5 | 26-30 | Invasive | 3 | ER-/HER2- | No  |     |

MS: Manchester score. ACMG: American college of Medical Genetics classification. CNV: copy number variant.

**Supplementary Table 2: Rates of pathogenic variants found in the POSH study**

| POSH         | Total cases | Total PVs | %     | <i>BRCA1</i> | %     | <i>BRCA2</i> | %     | <i>TP53</i> | %    | <i>BRCA1/BRCA2/TP53 combined</i> | <i>CHEK2 c.1100delC</i> | %     |
|--------------|-------------|-----------|-------|--------------|-------|--------------|-------|-------------|------|----------------------------------|-------------------------|-------|
| ≤25 years    | 38          | 11        | 28.9% | 4            | 10.5% | 4            | 10.5% | 2           | 5.3% | 26.3%                            | 1                       | 2.63% |
| 26-30 years* | 249         | 45        | 18.1% | 28           | 11.2% | 13           | 5.2%  | 3           | 1.2% | 17.7%                            | 2                       | 0.80% |
| Total        | 287         | 56        | 19.5% | 32           | 11.1% | 17           | 5.9%  | 5           | 1.7% | 18.8%                            | 3                       | 1.05% |

\* One woman carried both a *BRCA2* and *CHEK2 c.1100delC* pathogenic variant.

**Supplementary Table 3: Prevalence rate by age group from the Ambry Genetics online tool.**

| Age group                | <26y  | 26-30y | 31-40y | 41-50y | 51-60y | 61-70y | >70y  |
|--------------------------|-------|--------|--------|--------|--------|--------|-------|
| <i>BRCA1</i> PV          | 5%    | 5.77%  | 3.68%  | 1.40%  | 1.15%  | 0.81%  | 0.51% |
| <i>BRCA2</i> PV          | 2.33% | 3.29%  | 2.48%  | 1.56%  | 1.64%  | 1.58%  | 1.39% |
| <i>TP53</i> PV           | 4.19% | 1.93%  | 0.50%  | 0.18%  | 0.22%  | 0.15%  | 0.13% |
| <i>CHEK2</i> PV          | 2.76% | 3.50%  | 2.63%  | 2.75%  | 2.52%  | 2.64%  | 2.04% |
| <i>ATM</i> PV            | 2.30% | 2.07%  | 1.66%  | 1.15%  | 1.24%  | 0.98%  | 0.92% |
| <i>PALB2</i> PV          | 2.62% | 0.52%  | 1.03%  | 0.95%  | 1.05%  | 0.83%  | 0.49% |
| Total individuals tested | 300   | 1247   | 10462  | 24016  | 14582  | 8401   | 3090  |

PV: pathogenic variant.
